# Supplementary material for: iStable 2.0: Predicting protein thermal stability changes by integrating various characteristic modules
Source: PubMed Central journal article supplement — Comput Struct Biotechnol J. 2020 Mar 6;18:622–30. doi: 10.1016/j.csbj.2020.02.021 (PMC7090336; doi:10.1016/j.csbj.2020.02.021), 2020-03-06
Supplement: mmc1.pdf [file mmc1.pdf]

The following charts reflect the ranked feature importance of the XGBoost algorithm. Feature importance is the number of times a feature used to split the data across all trees.

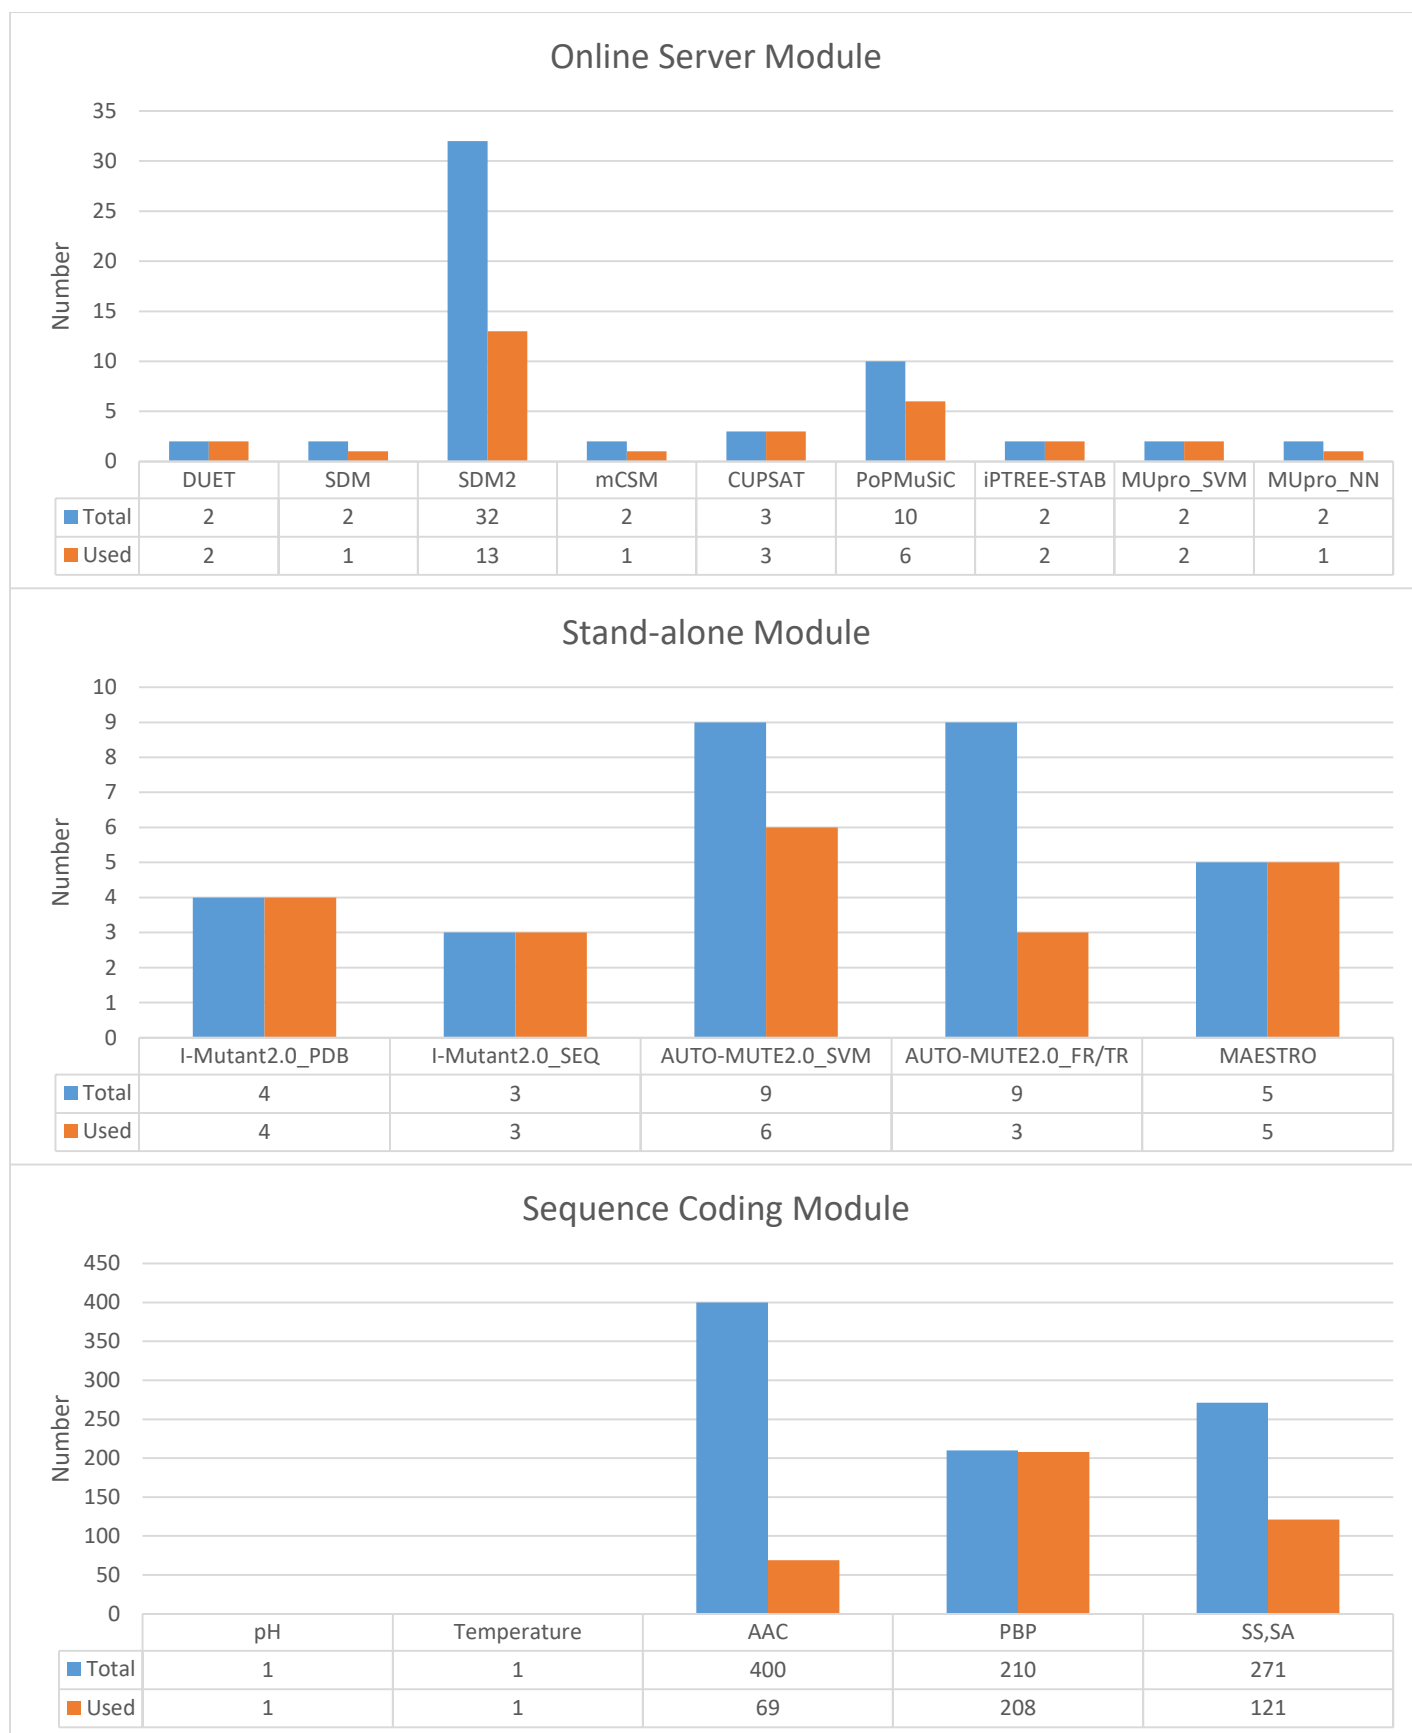

Fig. S1. Feature usage with the iStable2.0\_PDB model.

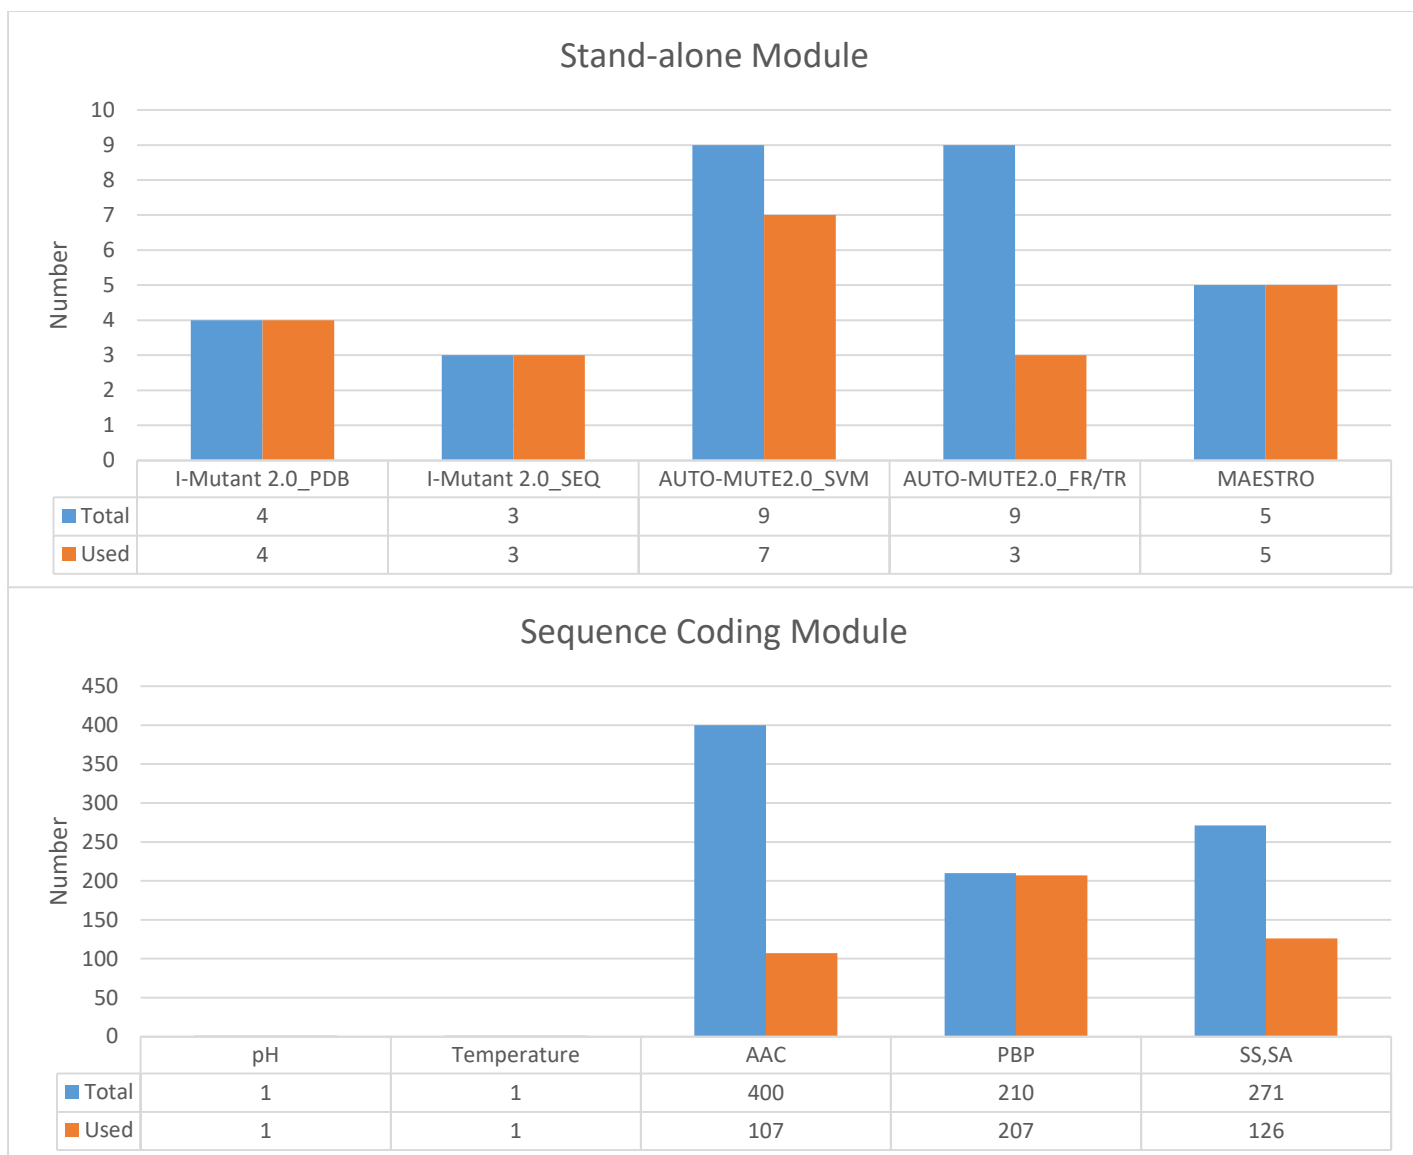

Fig. S2. Feature usage with the iStable2.0 PBD\_SASC model.

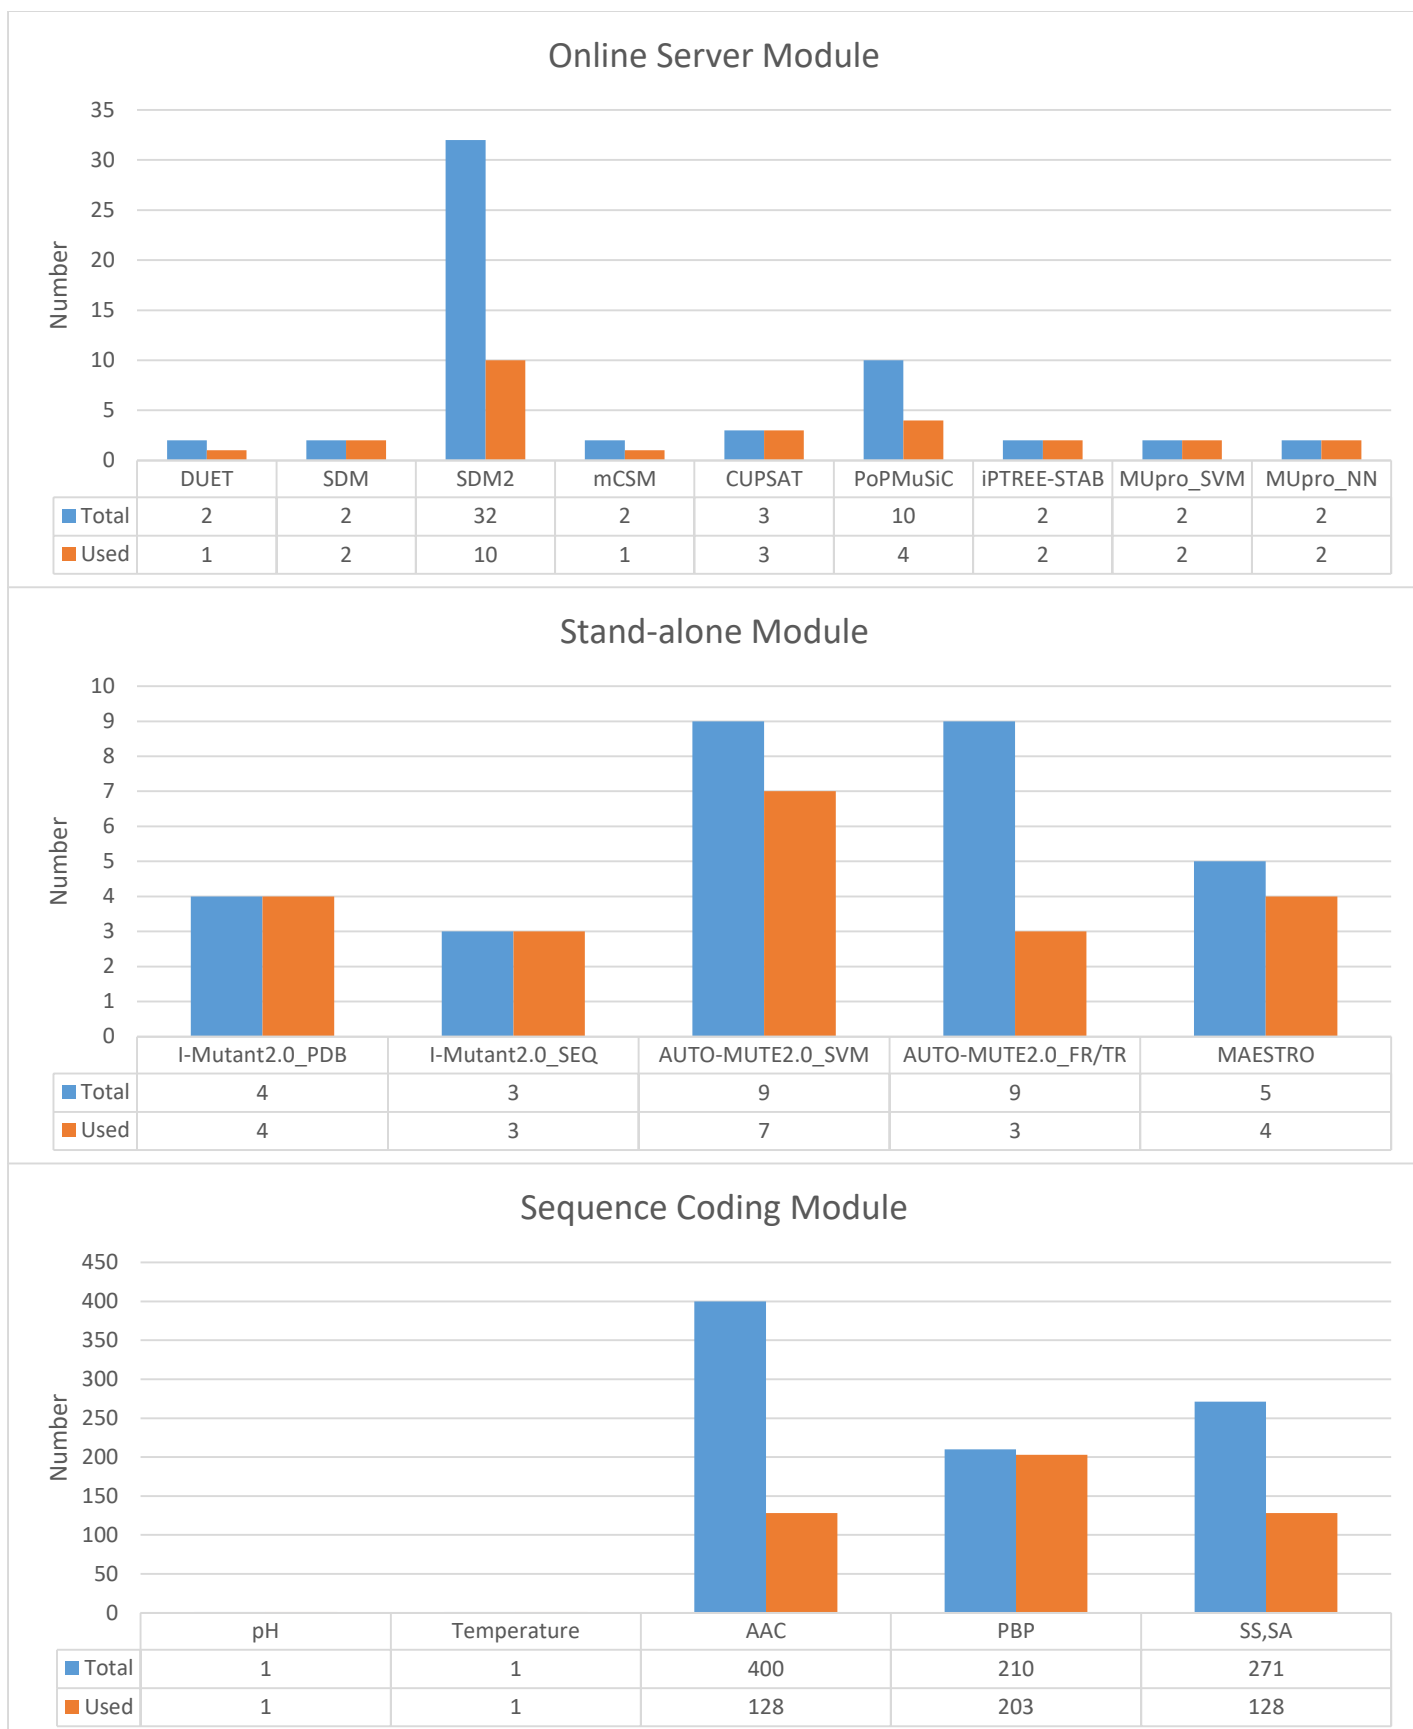

Fig. S3. Feature usage with the iStable2.0\_PDB\_Regression model.

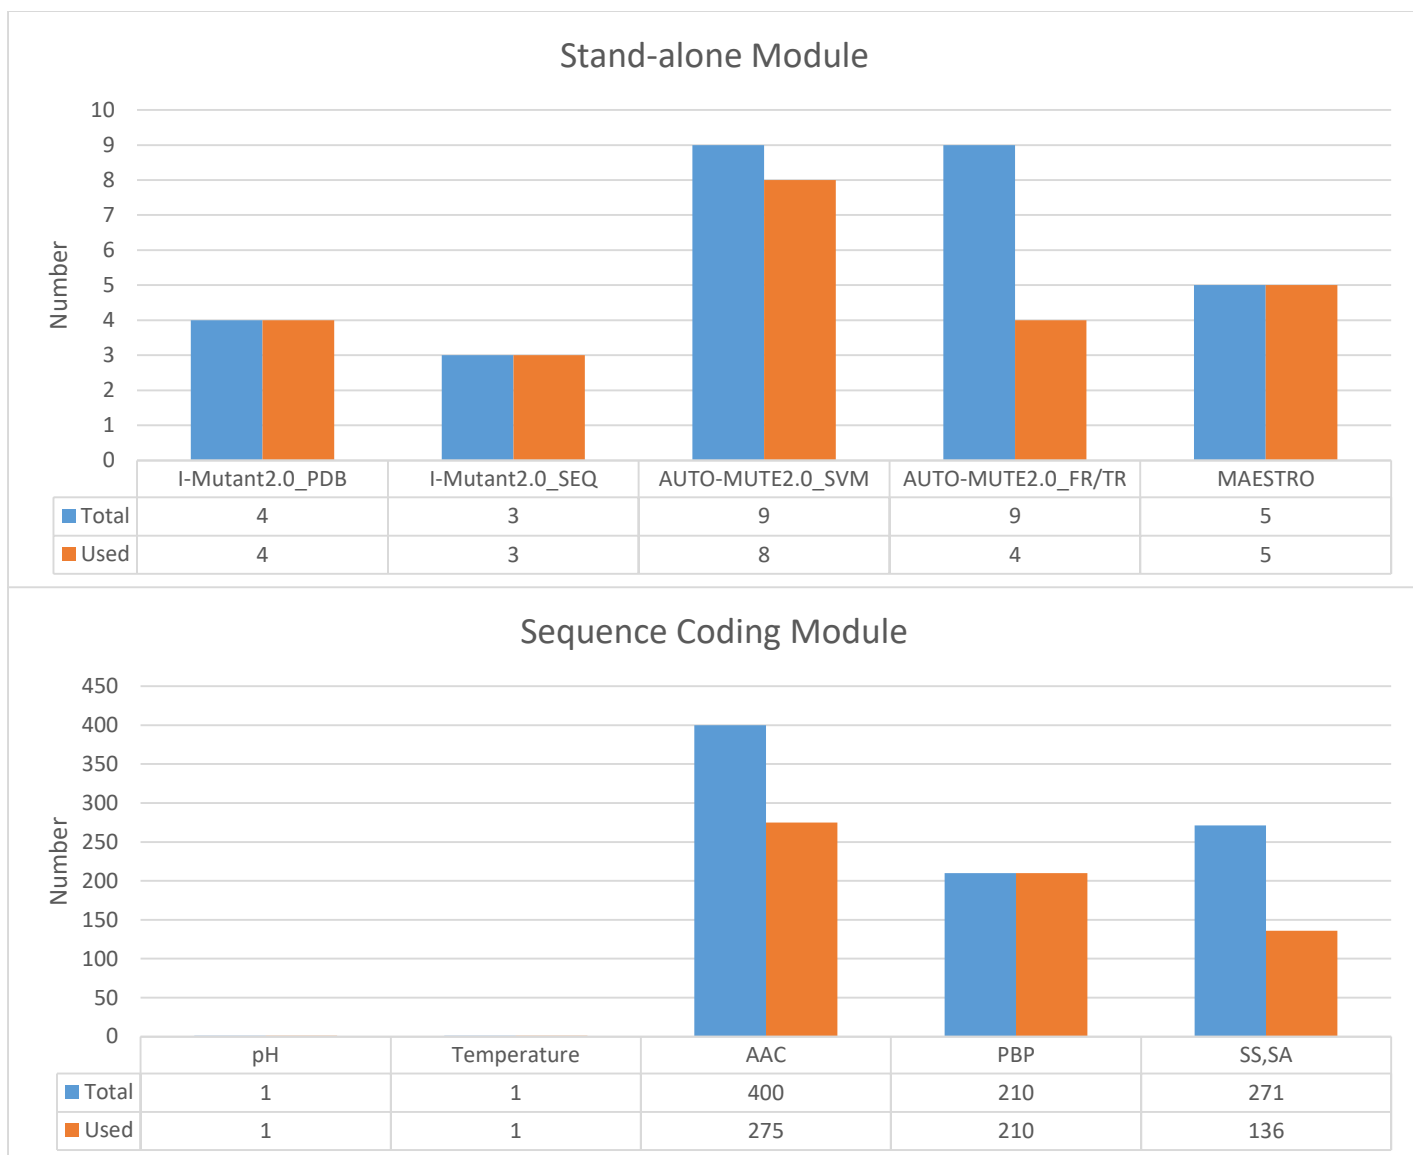

Fig. S4. Feature usage with the iStable2.0\_PDB\_Regression\_SASC model.

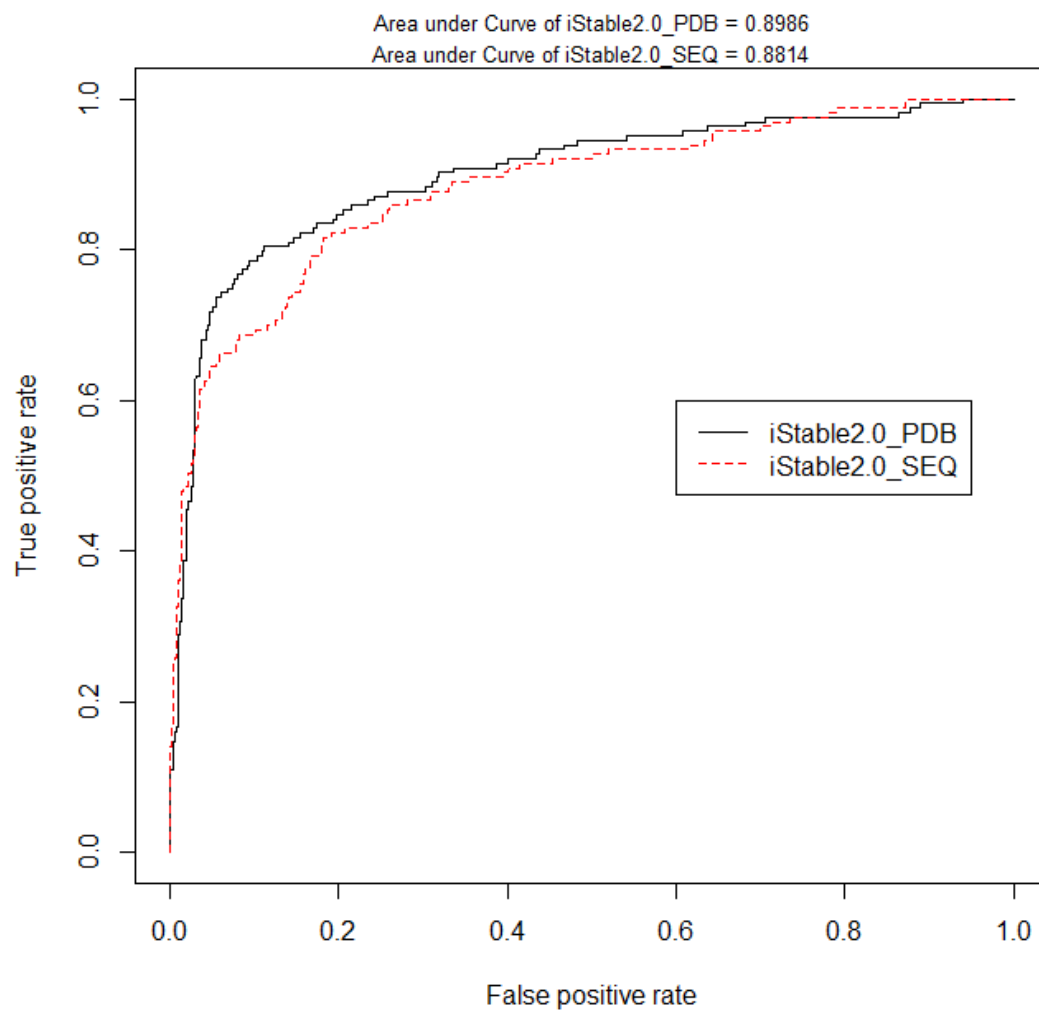

Fig. S5. The ROC curves of iStable2.0 with classification models.
