# Supplementary material for: iStable 2.0: Predicting protein thermal stability changes by integrating various characteristic modules
Source: PubMed Central journal article supplement — Comput Struct Biotechnol J. 2020 Mar 6;18:622–30. doi: 10.1016/j.csbj.2020.02.021 (PMC7090336; doi:10.1016/j.csbj.2020.02.021), 2020-03-06
Supplement: mmc2.pdf [file mmc2.pdf]

Table S1 Tools evaluated for predicting protein stability change.

| <b>Tool</b>  | <b>Published</b> | <b>Execution time</b> | <b>Availability</b> | <b>Integrated</b> |
|--------------|------------------|-----------------------|---------------------|-------------------|
| I-Mutant2.0  | 2005             | 1 sec.                | Stand alone         | V                 |
| MUpro        | 2006             | 1 sec.                | Online              | V                 |
| CUPSAT       | 2006             | 1 sec.                | Online              | V                 |
| iPTREE-STAB  | 2007             | 1 sec.                | Online              | V                 |
| PoPMuSiC     | 2009             | 2 min.                | Online              | V                 |
| AUTO-MUTE2.0 | 2010             | 1 sec.                | Stand alone         | V                 |
| MuStab       | 2010             | NA                    | Online              |                   |
| SDM          | 2011             | 1 min.                | Online              | V                 |
| mCSM         | 2014             | 1 min.                | Online              | V                 |
| DUET         | 2014             | 1 min.                | Online              | V                 |
| MAESTRO      | 2015             | 1 sec.                | Stand alone         | V                 |
| INPS         | 2015             | >20min.               | Online              |                   |
| EASE-MM      | 2016             | >1hr.                 | Online              |                   |
| ELASPIC      | 2016             | >10min.               | Online              |                   |
| SDM2         | 2017             | 1min.                 | Online              | V                 |
| TopologyNet  | 2017             | >1hr.                 | Online              |                   |
| TML          | 2017             | >1hr.                 | Online              |                   |
| DynaMut      | 2018             | >10min.               | Online              |                   |

Table S2 Features from the prediction results using different protein sequence tools.

| <b>Tool</b>     | <b>Prediction results</b>                | <b>Feature bits</b> |
|-----------------|------------------------------------------|---------------------|
| I-Mutant2.0_SEQ | Prediction, ddG value, Reliability index | 3                   |
| MUpro_SVM       | Prediction, Confidence score             | 2                   |
| MUpro_NN        | Prediction, Confidence score             | 2                   |
| iPTREE-STAB     | Prediction, ddG value                    | 2                   |

I-Mutant2.0\_SEQ: I-Mutant 2.0 prediction strategy using protein sequence.

MUpro\_SVM: MUpro SVM prediction model.

MUpro\_NN: MUpro NN prediction model.

Prediction: decrease or increase.

Table S3 Features from the prediction results using different protein structure tools.

| <b>Tool</b>        | <b>Prediction results</b>                                                                                                                                            | <b>Feature bits</b> |
|--------------------|----------------------------------------------------------------------------------------------------------------------------------------------------------------------|---------------------|
| I-Mutant2.0_PDB    | Prediction, ddG value, RSA, Reliability index                                                                                                                        | 4                   |
| CUPSAT             | Prediction, ddG value, RSA                                                                                                                                           | 3                   |
| PoPMuSiC           | Prediction, ddG value, SS, RSA                                                                                                                                       | 10                  |
| AUTO-MUTE2.0_SVM   | Prediction, ddG value, RSA, SS, Confidence score                                                                                                                     | 9                   |
| AUTO-MUTE2.0_RF/TR | Prediction, ddG value, RSA, SS, Confidence score                                                                                                                     | 9                   |
| SDM                | Prediction, ddG value                                                                                                                                                | 2                   |
| DUET               | Prediction, ddG value                                                                                                                                                | 2                   |
| mCSM               | Prediction, ddG value                                                                                                                                                | 2                   |
| MAESTRO            | Prediction, ddG value, ddG Confidence, Score, delta_score                                                                                                            | 5                   |
| SDM2               | Prediction, ddG value, Wild-type_SS, Wild-type_RSA, Wild-type_depth, Wild-type_OSP, Wild-type_H-hond, Mutant_SS, Mutant_RSA, Mutant_depth, Mutant_OSP, Mutant_H-hond | 32                  |

I-Mutant2.0\_PDB: I-Mutant 2.0 prediction strategy using PDB ID.

AUTO-MUTE2.0\_RF/TR: AUTO-MUTE 2.0 Random Forest prediction model; Prediction and Confidence scores from Random Forest, ddG value from TR (Tree Regression: REPTree).

AUTO-MUTE2.0\_SVM: AUTO-MUTE 2.0 SVM prediction model; Prediction and Confidence score from SVM, ddG value from SVR.

Prediction: decrease or increase.

RSA: relative solvent accessible area.

SS: secondary structure.

Table S4 20-bit amino acid encoding.

| <b>Amino acid</b> | <b>1-Letter</b> | <b>Encoding</b>      |
|-------------------|-----------------|----------------------|
| Alanine           | A               | 00000000000000000001 |
| Cysteine          | C               | 00000000000000000010 |
| Aspartic acid     | D               | 00000000000000000100 |
| Glutamic acid     | E               | 00000000000000001000 |
| Phenylalanine     | F               | 00000000000000010000 |
| Glycine           | G               | 00000000000000100000 |
| Histidine         | H               | 0000000000001000000  |
| Isoleucine        | I               | 0000000000010000000  |
| Lysine            | K               | 0000000000100000000  |
| Leucine           | L               | 0000000001000000000  |
| Methionine        | M               | 0000000010000000000  |
| Asparagine        | N               | 0000000100000000000  |
| Proline           | P               | 0000001000000000000  |
| Glutamine         | Q               | 0000010000000000000  |
| Arginine          | R               | 0000100000000000000  |
| Serine            | S               | 0001000000000000000  |
| Threonine         | T               | 0010000000000000000  |
| Valine            | V               | 0100000000000000000  |
| Tryptophan        | W               | 1000000000000000000  |
| Tyrosine          | Y               | 1000000000000000000  |
| Gap               | -               | 0000000000000000000  |

Table S5 William *et al.* encoding.

| <b>Amino acid</b> | <b>Polarity</b> | <b>Secondary structure</b> | <b>Molecular size or volume</b> | <b>Codon diversity</b> | <b>Electrostatic charge</b> |
|-------------------|-----------------|----------------------------|---------------------------------|------------------------|-----------------------------|
| A                 | -0.591          | -1.302                     | -0.733                          | 1.570                  | -0.146                      |
| C                 | -1.343          | 0.465                      | -0.862                          | -1.020                 | -0.255                      |
| D                 | 1.050           | 0.302                      | -3.656                          | -0.259                 | -3.242                      |
| E                 | 1.357           | -1.453                     | 1.477                           | 0.113                  | -0.837                      |
| F                 | -1.006          | -0.59                      | 1.891                           | -0.397                 | 0.412                       |
| G                 | -0.384          | 1.652                      | 1.330                           | 1.045                  | 2.064                       |
| H                 | 0.336           | -0.417                     | -1.673                          | -1.474                 | -0.078                      |
| I                 | -1.239          | -0.547                     | 2.131                           | 0.393                  | 0.816                       |
| K                 | 1.831           | -0.561                     | 0.533                           | -0.277                 | 1.648                       |
| L                 | -1.019          | -0.987                     | -1.505                          | 1.266                  | -0.912                      |
| M                 | -0.663          | -1.524                     | 2.219                           | -1.005                 | 1.212                       |
| N                 | 0.945           | 0.828                      | 1.299                           | -0.169                 | 0.933                       |
| P                 | 0.189           | 2.081                      | -1.628                          | 0.421                  | -1.392                      |
| Q                 | 0.931           | -0.179                     | -3.005                          | -0.503                 | -1.853                      |
| R                 | 1.538           | -0.055                     | 1.502                           | 0.440                  | 2.897                       |
| S                 | -0.228          | 1.399                      | -4.760                          | 0.670                  | -2.647                      |
| T                 | -0.032          | 0.326                      | 2.213                           | 0.908                  | 1.313                       |
| V                 | -1.337          | -0.279                     | -0.544                          | 1.242                  | -1.262                      |
| W                 | -0.595          | 0.009                      | 0.672                           | -2.128                 | -0.184                      |
| Y                 | 0.260           | 0.830                      | 3.097                           | -0.838                 | 1.512                       |
| -                 | 0.000           | 0.000                      | 0.000                           | 0.000                  | 0.000                       |

Table S6 Mathura *et al.* encoding.

| <b>Amino Acid</b> | <b>Hydrophobicity</b> | <b>Side chain length</b> | <b><math>\alpha</math>-helix propensity</b> | <b>Number of codons</b> | <b><math>\beta</math>-strand propensity</b> |
|-------------------|-----------------------|--------------------------|---------------------------------------------|-------------------------|---------------------------------------------|
| A                 | 0.008                 | 0.134                    | -0.475                                      | -0.039                  | 0.181                                       |
| R                 | 0.171                 | -0.361                   | 0.107                                       | -0.258                  | -0.364                                      |
| N                 | 0.255                 | 0.038                    | 0.117                                       | 0.118                   | -0.055                                      |
| D                 | 0.303                 | -0.057                   | -0.014                                      | 0.225                   | 0.156                                       |
| C                 | -0.132                | 0.174                    | 0.070                                       | 0.565                   | -0.374                                      |
| Q                 | 0.149                 | -0.184                   | -0.030                                      | 0.035                   | -0.112                                      |
| E                 | 0.221                 | -0.280                   | -0.315                                      | 0.157                   | 0.303                                       |
| G                 | 0.218                 | 0.562                    | -0.024                                      | 0.018                   | 0.106                                       |
| H                 | 0.023                 | -0.177                   | 0.041                                       | 0.280                   | -0.021                                      |
| I                 | -0.353                | 0.071                    | -0.088                                      | -0.195                  | -0.107                                      |
| L                 | -0.267                | 0.018                    | -0.265                                      | -0.274                  | 0.206                                       |
| K                 | 0.243                 | -0.339                   | -0.044                                      | -0.325                  | -0.027                                      |
| M                 | -0.239                | -0.141                   | -0.155                                      | 0.321                   | 0.077                                       |
| F                 | -0.329                | -0.023                   | 0.072                                       | -0.002                  | 0.208                                       |
| P                 | 0.173                 | 0.286                    | 0.407                                       | -0.215                  | 0.384                                       |
| S                 | 0.199                 | 0.238                    | -0.015                                      | -0.068                  | -0.196                                      |
| T                 | 0.068                 | 0.147                    | -0.015                                      | -0.132                  | -0.274                                      |
| W                 | -0.296                | -0.186                   | 0.389                                       | 0.083                   | 0.297                                       |
| Y                 | -0.141                | -0.057                   | 0.425                                       | -0.096                  | -0.091                                      |
| V                 | -0.274                | 0.136                    | -0.187                                      | -0.196                  | -0.299                                      |
| -                 | 0.000                 | 0.000                    | 0.000                                       | 0.000                   | 0.000                                       |

Table S7 Comparison of the machine learning algorithms in the classification models trained with S3568.

| <b>Model</b>           | <b>Type</b>           | <b>Method</b>              | <b>Sn</b> | <b>Sp</b> | <b>Acc</b> | <b>MCC</b> |
|------------------------|-----------------------|----------------------------|-----------|-----------|------------|------------|
| <b>Structure-based</b> | Tree                  | XGBoost                    | 0.758     | 0.964     | 0.908      | 0.758      |
|                        | Function              | SVM                        | 0.737     | 0.961     | 0.901      | 0.738      |
|                        | Meta                  | EnsembleSelection          | 0.733     | 0.960     | 0.900      | 0.735      |
|                        | Meta                  | RandomSubSpace             | 0.707     | 0.969     | 0.900      | 0.734      |
|                        | Rules                 | FURIA                      | 0.715     | 0.966     | 0.899      | 0.732      |
|                        | Tree                  | SysFor                     | 0.751     | 0.947     | 0.895      | 0.724      |
|                        | Tree                  | SimpleCart                 | 0.733     | 0.954     | 0.895      | 0.723      |
|                        | Tree                  | ForestPA                   | 0.707     | 0.964     | 0.896      | 0.723      |
|                        | Tree                  | BFTree                     | 0.725     | 0.955     | 0.894      | 0.719      |
|                        | Meta                  | Decorate                   | 0.767     | 0.937     | 0.892      | 0.717      |
|                        | Tree                  | LMT                        | 0.730     | 0.951     | 0.892      | 0.715      |
|                        | <b>Sequence-based</b> | Tree                       | XGBoost   | 0.670     | 0.953      | 0.877      |
| Function               |                       | SVM                        | 0.674     | 0.946     | 0.874      | 0.662      |
| Tree                   |                       | ForestPA                   | 0.641     | 0.956     | 0.872      | 0.655      |
| Meta                   |                       | RandomSubSpace             | 0.599     | 0.969     | 0.871      | 0.650      |
| Meta                   |                       | EnsembleSelection          | 0.586     | 0.967     | 0.866      | 0.636      |
| Rules                  |                       | MODLEM                     | 0.619     | 0.954     | 0.865      | 0.635      |
| Tree                   |                       | SysFor                     | 0.660     | 0.936     | 0.863      | 0.633      |
| Meta                   |                       | Decorate                   | 0.685     | 0.923     | 0.860      | 0.630      |
| Rules                  |                       | FURIA                      | 0.604     | 0.957     | 0.863      | 0.628      |
| Lazy                   |                       | LWL                        | 0.551     | 0.975     | 0.862      | 0.626      |
| Tree                   |                       | LADTree                    | 0.601     | 0.957     | 0.862      | 0.626      |
| Bayes                  |                       | BayesianLogisticRegression | 0.655     | 0.933     | 0.859      | 0.624      |

Table S8 Comparison of the machine learning algorithms in the regression models trained with S3568.

| <b>Model</b>           | <b>Type</b> | <b>Method</b>        | <b>PCC</b> |
|------------------------|-------------|----------------------|------------|
| <b>Structure-based</b> | Tree        | XGBoost              | 0.864      |
|                        | Tree        | RandomForest         | 0.833      |
|                        | Meta        | RandomSubSpace       | 0.832      |
|                        | Tree        | M5P                  | 0.828      |
|                        | Meta        | EnsembleSelection    | 0.823      |
|                        | Tree        | AlternatingModelTree | 0.821      |
|                        | Rule        | M5Rules              | 0.821      |
|                        | Function    | PaceRegression       | 0.819      |
|                        | Meta        | RandomCommittee      | 0.814      |
|                        | Meta        | MultiSearch          | 0.812      |
|                        | Function    | GaussianProcesses    | 0.810      |
| <b>Sequence-based</b>  | Tree        | XGBoost              | 0.818      |
|                        | Tree        | RandomForest         | 0.798      |
|                        | Meta        | RandomCommittee      | 0.779      |
|                        | Meta        | RandomSubSpace       | 0.752      |
|                        | Tree        | M5P                  | 0.713      |
|                        | Function    | PaceRegression       | 0.707      |
|                        | Tree        | AlternatingModelTree | 0.706      |
|                        | Function    | GaussianProcesses    | 0.704      |
|                        | Meta        | MultiSearch          | 0.701      |
|                        | Function    | LinearRegression     | 0.700      |
|                        | Rule        | M5Rules              | 0.692      |

Table S9 Ranking of important features with f-scores greater than 100 in the structure-based classification model.

| Feature name          | F-score | Feature name                      | F-score |
|-----------------------|---------|-----------------------------------|---------|
| MAESTRO_ddG           | 682     | PBP_W-M_α-helix propensity        | 188     |
| MAESTRO_ddG_Conf.     | 568     | PBP_W-M_β-strand propensity       | 178     |
| AUTO-MUTE2.0_FR       | 456     | I-Mutant2.0_PDB_Reliability index | 176     |
| AUTO-MUTE2.0_FR_Conf. | 442     | PBP_W-M_Polarity                  | 174     |
| PoPMuSiC_ddG          | 432     | I-Mutant2.0_PDB                   | 166     |
| DUET_ddG              | 412     | PBP_W-M_Hydrophobicity            | 156     |
| pH                    | 404     | SDM2_Mutant_OSP                   | 142     |
| TEMPERATURE           | 374     | PBP_W-M_Codon diversity           | 138     |
| I-Mutant2.0_SEQ_ddG   | 360     | PBP_W-M_Side chain length         | 136     |
| AUTO-MUTE2.0_SVM_Conf | 336     | PBP_W-M_Secondary structure       | 134     |
| AUTO-MUTE2.0_SVM_DD   | 330     | PBP_W-M_Electrostatic charge      | 134     |
| MUpro_NN_Conf.        | 320     | NetSurfP_W13_ASA                  | 122     |
| CUPSAT_ddG            | 290     | NetSurfP_W3_RSA                   | 120     |
| MUpro_SVM_Conf.       | 286     | NetSurfP_W1_Coil                  | 116     |
| iPTREE-STAB_ddG       | 266     | NetSurfP_W8_ASA                   | 112     |
| I-Mutant2.0_PDB_ddG   | 266     | PBP_M_Side chain length           | 110     |
| MAESTRO_delta_score   | 256     | NetSurfP_W8_Z-score               | 110     |
| SDM_ddG               | 248     | PBP_W-M_Number of codons          | 110     |
| mCSM_ddG              | 228     | NetSurfP_W18_RSA                  | 108     |
| MAESTRO_score         | 210     | NetSurfP_Alpha-Helix*             | 102     |
| AUTO-MUTE2.0_TR_ddG   | 208     | NetSurfP_W15_ASA                  | 102     |
| NetSurfP_Coil*        | 198     | I-Mutant2.0_SEQ_Reliability index | 100     |
| NetSurfP_Buried*      | 194     |                                   |         |

\*we calculated the frequency of the three secondary structures in the entire protein.

OSP: residue occluded surface.

PBP: physicochemical and biochemical properties.

Tool name: decrease or increase.

RSA: relative surface accessibility.

ASA: absolute surface accessibility.

W-M: differences between the attributes of the wild-type and mutant amino acids.

W+number: number = {1, 2, 3, 4, 5, 6, 7, 8, 9, mutant, 10, 11, 12, 13, 14, 15, 16, 17, 18} amino acids position.

F-score: the number of times a feature is used to split the data across all trees (XGBoost).



Table S10 Ranking of important features with f-scores greater than 100 in the sequence-based classification model.

| <b>Feature name</b>               | <b>F-score</b> |
|-----------------------------------|----------------|
| pH                                | 624            |
| MUpro_SVM_Conf.                   | 616            |
| I-Mutant2.0_SEQ_ddG               | 600            |
| iPTREE-STAB_ddG                   | 438            |
| TEMPERATURE                       | 434            |
| MUpro_NN_Conf.                    | 402            |
| I-Mutant2.0_SEQ_Reliability index | 258            |
| PBP_W-M_Hydrophobicity            | 220            |
| PBP_W-M_β-strand propensity       | 188            |
| PBP_W-M_Side chain length         | 170            |
| PBP_W-M_Electrostatic charge      | 168            |
| PBP_W-M_Number of codons          | 162            |
| NetSurfP_Buried*                  | 134            |
| PBP_W-M_Secondary structure       | 130            |
| iPTREE-STAB                       | 122            |
| PBP_W-M_Codon diversity           | 118            |
| NetSurfP_W17_RSA                  | 114            |
| PBP_W-M_Molecular size or volume  | 114            |
| PBP_W-M_Polarity                  | 112            |
| NetSurfP_Alpha-Helix*             | 110            |
| NetSurfP_W17_Z-score              | 106            |
| NetSurfP_W5_RSA                   | 100            |

\*we calculated the frequency of the three secondary structures in the entire protein.

PBP: physicochemical and biochemical properties.

Tool name: decrease or increase.

RSA: relative surface accessibility.

W-M: differences between the attributes of the wild-type and mutant amino acids.

W+number: number = {1, 2, 3, 4, 5, 6, 7, 8, 9, mutant, 10, 11, 12, 13, 14, 15, 16, 17, 18} amino acids position.

F-score: the number of times a feature is used to split the data across all trees (XGBoost).

Table S11 Ranking of important features with f-scores greater than 100 in the structure-based regression model.

| <b>Feature name</b>    | <b>F-score</b> |
|------------------------|----------------|
| AUTO-MUTE2.0_SVM_ddG   | 394            |
| iPTREE-STAB_ddG        | 153            |
| I-Mutant2.0_PDB_ddG    | 140            |
| AUTO-MUTE_TR_ddG       | 137            |
| TEMPERATURE            | 131            |
| MAESTRO_ddG            | 130            |
| DUET_ddG               | 119            |
| mCSM_ddG               | 116            |
| AUTO-MUTE2.0_SVM_Conf. | 109            |
| PoPMuSiC_ddG           | 107            |
| AUTO-MUTE2.0_FR_Conf.  | 106            |

F-score: The number of times a feature is used to split the data across all trees (XGBoost).

Table S12 Ranking of important features with f-scores greater than 100 in the sequence-based regression model.

| <b>Feature name</b>              | <b>F-score</b> |
|----------------------------------|----------------|
| I-Mutant2.0_SEQ_ddG              | 331            |
| iPTREE-STAB_ddG                  | 329            |
| PBP_W-M_Hydrophobicity           | 228            |
| pH                               | 196            |
| MUpro_NN_Conf.                   | 187            |
| PBP_W-M_β-strand propensity      | 161            |
| TEMPERATURE                      | 158            |
| NetSurfP_Beta-strand*            | 150            |
| PBP_W-M_Number of codons         | 135            |
| PBP_W-M_α-helix propensity       | 125            |
| PBP_W-M_Secondary structure      | 119            |
| PBP_W-M_Polarity                 | 116            |
| NetSurfP_Buried*                 | 111            |
| NetSurfP_W19_Z-score             | 109            |
| PBP_W-M_Molecular size or volume | 106            |

\*we calculated the frequency of the three secondary structures in the entire protein.

PBP: physicochemical and biochemical properties.

W-M: differences between the attributes of the wild-type and mutant amino acids.

F-score: the number of times a feature is used to split the data across all trees (XGBoost).

Table S13 Ranking of important features with f-scores greater than 100 in iStable2.0\_PBD\_SASC.

| <b>Feature name</b>               | <b>F-score</b> |
|-----------------------------------|----------------|
| MAESTRO_ddG                       | 516            |
| AUTO-MUTE2.0_FR_Conf              | 410            |
| AUTO-MUTE2.0_FR                   | 328            |
| MAESTRO_ddG_Conf.                 | 286            |
| TEMPERATURE                       | 282            |
| AUTO-MUTE2.0_SVM_Conf.            | 258            |
| I-Mutant2.0_SEQ_ddG               | 244            |
| AUTO-MUTE2.0_SVM_ddgG             | 232            |
| I-Mutant2.0_PDB_ddG               | 216            |
| MAESTRO_delta_score               | 206            |
| NetSurfP_Coil*                    | 152            |
| I-Mutant2.0_SEQ_Reliability index | 150            |
| MAESTRO_score                     | 148            |
| PBP_W-M_α-helix propensity        | 134            |
| pH                                | 124            |
| AUTO-MUTE2.0_FR_ddG               | 124            |
| PBP_W-M_Polarity                  | 120            |
| I-Mutant2.0_PDB                   | 106            |
| PBP_W-M_Number of codons          | 102            |
| PBP_W-M_Codon diversity           | 100            |

\*we calculated the frequency of the three secondary structures in the entire protein.

PBP: physicochemical and biochemical properties.

Tool name: decrease or increase.

W-M: differences between the attributes of the wild-type and mutant amino acids.

F-score: the number of times a feature is used to split the data across all trees (XGBoost).

Table S14 Ranking of important features with f-scores greater than 100 in iStable2.0\_SEQ\_SASC.

| <b>Feature name</b>                 | <b>F-score</b> | <b>Feature name</b>             | <b>F-score</b> |
|-------------------------------------|----------------|---------------------------------|----------------|
| pH                                  | 2740           | PBP_W8_Electrostatic charge     | 160            |
| I-Mutant2.0_SEQ_ddG                 | 2228           | NetSurfP_W16_ASA                | 158            |
| TEMPERATURE                         | 1988           | NetSurfP_Beta-strand*           | 158            |
| I-Mutant2.0_SEQ_Reliability index   | 1344           | NetSurfP_W17_ASA                | 156            |
| PBP_W-M_Hydrophobicity              | 724            | NetSurfP_W4_RSA                 | 152            |
| PBP_W-M_Secondary structure         | 716            | PBP_W7_Number of codons         | 152            |
| PBP_W-M_β-strand propensity         | 708            | NetSurfP_W7_ASA                 | 150            |
| PBP_W-M_Electrostatic charge        | 700            | NetSurfP_W13_ASA                | 148            |
| PBP_W-M_Side chain length           | 592            | NetSurfP_W3_ASA                 | 146            |
| PBP_W-M_Codon diversity             | 576            | NetSurfP_W2_RSA                 | 146            |
| PBP_W-M_Molecular size or volume    | 554            | NetSurfP_W9_ASA                 | 142            |
| PBP_W-M_Number of codons            | 548            | PBP_W18_Secondary structure     | 142            |
| PBP_W-M_α-helix propensity          | 474            | NetSurfP_W1_Coil                | 138            |
| PBP_W-M_Polarity                    | 440            | NetSurfP_W14_ASA                | 138            |
| I-Mutant2.0_SEQ                     | 420            | NetSurfP_W4_Z-score             | 138            |
| PBP_Mutant_Secondary structure      | 394            | NetSurfP_W9_Coil                | 138            |
| NetSurfP_Buried*                    | 392            | NetSurfP_W14_RSA                | 136            |
| PBP_Mutant_β-strand propensity      | 360            | NetSurfP_W8_ASA                 | 134            |
| PBP_Mutant_Polarity                 | 350            | PBP_W18_α-helix propensity      | 130            |
| PBP_Mutant_Number of codons         | 338            | NetSurfP_W19_Zscore             | 130            |
| PBP_Mutant_Molecular size or volume | 312            | PBP_W8_Molecular size or volume | 130            |
| PBP_Mutant_Electrostatic charge     | 308            | PBP_W9_β-strand propensity      | 130            |
| NetSurfP_W5_RSA                     | 270            | NetSurfP_W14_Coil               | 128            |
| NetSurfP_W5_Z-score                 | 268            | PBP_W9_β-strand propensity      | 128            |
| NetSurfP_W12_ASA                    | 264            | NetSurfP_W11_RSA                | 124            |
| NetSurfP_W15_ASA                    | 260            | PBP_W19_α-helix propensity      | 124            |
| PBP_Mutant_Hydrophobicity           | 252            | NetSurfP_W18_ASA                | 122            |
| NetSurfP_Alpha-Helix*               | 248            | NetSurfP_W2_ASA                 | 120            |
| NetSurfP_W10_RSA                    | 246            | NetSurfP_W19_RSA                | 120            |
| PBP_Mutant_Side chain length        | 246            | PBP_W3_Molecular size or volume | 120            |
| NetSurfP_W15_Zscore                 | 240            | PBP_W3_Codon diversity          | 120            |
| PBP_Mutant_Codon diversity          | 236            | PBP_W8_Polarity                 | 118            |
| NetSurfP_W5_ASA                     | 236            | NetSurfP_W12_Coil               | 118            |
| NetSurfP_W10_ASA                    | 232            | PBP_W4_Hydrophobicity           | 116            |
| NetSurfP_W17_Z-score                | 232            | PBP_W15_Codon diversity         | 114            |
| NetSurfP_W11_Z-score                | 230            | PBP_W16_Codon diversity         | 114            |

|                               |     |                                  |     |
|-------------------------------|-----|----------------------------------|-----|
| NetSurfP_W6_Z-score           | 230 | PBP_W5_Hydrophobicity            | 114 |
| NetSurfP_W14_Z-score          | 224 | PBP_W5_Secondary structure       | 110 |
| NetSurfP_W7_RSA               | 222 | PBP_W2_Number of codons          | 110 |
| NetSurfP_W8_Z-score           | 220 | NetSurfP_W7_Coil                 | 108 |
| PBP_Mutant_α-helix propensity | 218 | PBP_W7_β-strand propensity       | 108 |
| NetSurfP_W9_Z-score           | 218 | NetSurfP_W13_RSA                 | 106 |
| NetSurfP_W1_RSA               | 218 | PBP_W7_α-helix propensity        | 106 |
| NetSurfP_W7_Z-score           | 210 | NetSurfP_W19_ASA                 | 106 |
| NetSurfP_W10_Z-score          | 204 | NetSurfP_W18_RSA                 | 104 |
| NetSurfP_W2_Z-score           | 202 | PBP_W17_Codon diversity          | 104 |
| NetSurfP_W1_ASA               | 200 | PBP_W6_Codon diversity           | 104 |
| NetSurfP_Coil*                | 200 | PBP_W5_Codon diversity           | 104 |
| NetSurfP_W9_RSA               | 200 | NetSurfP_W12_Z-score             | 104 |
| NetSurfP_W1_Z-score           | 196 | PBP_W6_Polarity                  | 104 |
| NetSurfP_W13_Z-score          | 194 | PBP_W1_Polarity                  | 102 |
| NetSurfP_W16_Z-score          | 192 | NetSurfP_W6_RSA                  | 102 |
| NetSurfP_W15_RSA              | 190 | PBP_W11_Molecular size or volume | 102 |
| NetSurfP_W8_RSA               | 190 | PBP_W4_Molecular size or volume  | 100 |
| NetSurfP_W4_ASA               | 188 | NetSurfP_W7_Beta-strand          | 100 |
| NetSurfP_W12_RSA              | 182 | PBP_W17_Molecular size or volume | 100 |
| NetSurfP_W18_Z-score          | 178 | NetSurfP_W6_ASA                  | 100 |
| NetSurfP_W16_RSA              | 174 | PBP_W19_Molecular size or volume | 100 |
| NetSurfP_W3_Z-score           | 172 | PBP_W9_Molecular size or volume  | 100 |
| NetSurfP_W17_RSA              | 170 | PBP_W1_Number of codons          | 100 |
| NetSurfP_W3_RSA               | 162 |                                  |     |

\*we calculated the frequency of the three secondary structures in the entire protein.

PBP: physicochemical and biochemical properties.

Tool name: decrease or increase.

RSA: relative surface accessibility.

ASA: absolute surface accessibility.

W-M: differences between the attributes of the wild-type and mutant amino acids.

W+number: number = {1, 2, 3, 4, 5, 6, 7, 8, 9, mutant, 10, 11, 12, 13, 14, 15, 16, 17, 18} amino acids position.

F-score: the number of times a feature is used to split the data across all trees (XGBoost).

Table S15 Ranking of important features with f-scores greater than 100 in  
iStable2.0\_PDB\_Regression\_SASC

| <b>Feature name</b>               | <b>F-score</b> |
|-----------------------------------|----------------|
| I-Mutant2.0_PDB_ddG               | 554            |
| MAESTRO_ddG                       | 533            |
| AUTO-MUTE2.0_SVM_ddG              | 514            |
| TEMPERATURE                       | 437            |
| MAESTRO_ddG_Conf.                 | 429            |
| I-Mutant2.0_SEQ_ddG               | 357            |
| MAESTRO_delta_score               | 337            |
| MAESTRO_score                     | 322            |
| AUTO-MUTE2.0_TR_ddG               | 311            |
| AUTO-MUTE2.0_SVM_Conf.            | 287            |
| pH                                | 240            |
| PBP_W-M_β-strand propensity       | 215            |
| AUTO-MUTE2.0_FR_Conf.             | 208            |
| PBP_W-M_Hydrophobicity            | 194            |
| PBP_W-M_α-helix propensity        | 175            |
| PBP_W-M_Number of codons          | 171            |
| PBP_W-M_Codon diversity           | 169            |
| NetSurfP_Buried*                  | 166            |
| PBP_W-M_Polarity                  | 162            |
| I-Mutant2.0_SEQ_Reliability index | 147            |
| PBP_W-M_Molecular size or volume  | 146            |
| I-Mutant2.0_PDB_Reliability index | 141            |
| PBP_W-M_Side chain length         | 138            |
| I-Mutant2.0_PDB_RSA               | 133            |
| PBP_W-M_Electrostatic charge      | 127            |
| NetSurfP_Beta-strand*             | 126            |
| NetSurfP_W15_Z-score              | 106            |
| PBP_W-M_Secondary structure       | 105            |

\*we calculated the frequency of the three secondary structures in the entire protein.

PBP: physicochemical and biochemical properties.

RSA: relative surface accessibility.

W-M: differences between the attributes of the wild-type and mutant amino acids.

F-score: the number of times a feature is used to split the data across all trees (XGBoost).

Table S16 Ranking of important features with f-scores greater than 100 in  
iStable2.0\_SEQ\_Regression\_SASC

| <b>Feature name</b>               | <b>F-score</b> |
|-----------------------------------|----------------|
| I-Mutant2.0_SEQ_ddG               | 690            |
| TEMPERATURE                       | 689            |
| pH                                | 580            |
| PBP_W-M_β-strand propensity       | 326            |
| PBP_W-M_Hydrophobicity            | 321            |
| I-Mutant2.0_SEQ_Reliability index | 259            |
| PBP_W-M_Side chain length         | 256            |
| PBP_W-M_Number of codons          | 248            |
| PBP_W-M_Polarity                  | 219            |
| PBP_W-M_Secondary structure       | 213            |
| PBP_W-M_Molecular size or volume  | 206            |
| PBP_W-M_α-helix propensity        | 182            |
| PBP_W-M_Codon diversity           | 162            |
| PBP_W-M_Electrostatic charge      | 159            |
| NetSurfP_W11_Z-score              | 138            |
| NetSurfP_Beta-strand*             | 135            |
| NetSurfP_Buried*                  | 134            |
| NetSurfP_W19_Z-score              | 133            |
| PBP_M_Polarity                    | 129            |
| NetSurfP_W10_RSA                  | 114            |
| NetSurfP_W13_Z-score              | 111            |
| NetSurfP_W9_RSA                   | 108            |
| NetSurfP_W1_ASA                   | 108            |
| NetSurfP_W10_ASA                  | 105            |

\*we calculated the frequency of the three secondary structures in the entire protein.

PBP: physicochemical and biochemical properties.

RSA: relative surface accessibility.

ASA: absolute surface accessibility.

W-M: differences between the attributes of the wild-type and mutant amino acids.

W+number: number = {1, 2, 3, 4, 5, 6, 7, 8, 9, mutant, 10, 11, 12, 13, 14, 15, 16, 17, 18}  
amino acids position.

F-score: the number of times a feature is used to split the data across all trees (XGBoost).

Table S17 Comparison of feature usage in different models.

|                               |                 | iStable2.0_<br>SEQ |      | iStable2.0_<br>SEQ_SASC |      | iStable2.0_<br>SEQ_Regression |      | iStable2.0_<br>SEQ_Regression_SASC |      |
|-------------------------------|-----------------|--------------------|------|-------------------------|------|-------------------------------|------|------------------------------------|------|
|                               |                 | Total              | Used | Total                   | Used | Total                         | Used | Total                              | Used |
| <b>Online</b>                 | iPTREE-STAB     | 2                  | 2    | 0                       | 0    | 2                             | 2    | 0                                  | 0    |
| <b>Server</b>                 | MUpro_SVM       | 2                  | 2    | 0                       | 0    | 2                             | 1    | 0                                  | 0    |
| <b>Module</b>                 | MUpro_NN        | 2                  | 2    | 0                       | 0    | 2                             | 1    | 0                                  | 0    |
| <b>Stand-alone</b>            | I-Mutant2.0_SEQ | 3                  | 3    | 3                       | 3    | 3                             | 3    | 3                                  | 3    |
| <b>Module</b>                 |                 |                    |      |                         |      |                               |      |                                    |      |
| <b>Sequence Coding Module</b> | pH              | 1                  | 1    | 1                       | 1    | 1                             | 1    | 1                                  | 1    |
|                               | Temperature     | 1                  | 1    | 1                       | 1    | 1                             | 1    | 1                                  | 1    |
|                               | AAC             | 400                | 162  | 400                     | 275  | 400                           | 121  | 400                                | 270  |
|                               | PBP             | 210                | 209  | 210                     | 210  | 210                           | 204  | 210                                | 210  |
|                               | SS, SA          | 271                | 135  | 271                     | 151  | 271                           | 125  | 271                                | 136  |
|                               | Total of SCM    | 883                | 508  | 883                     | 638  | 883                           | 452  | 883                                | 618  |

AAC: amino acid coding.

PBP: physicochemical and biochemical properties.

SS, SA: secondary structure and surface accessibility.

Table S18 Performance of Majority Voting with S630.

| Method                 | Strategy | Sn    | Sp    | Acc   | MCC   |
|------------------------|----------|-------|-------|-------|-------|
| <b>Majority Voting</b> | A        | 0.405 | 0.970 | 0.824 | 0.493 |
|                        | B        | 0.258 | 0.981 | 0.794 | 0.383 |

Majority Voting: The 14 of voters contains DUET, SDM, SDM2, mCSM, CUPSAT, I-Mutant2.0\_PDB, PoPMuSiC, AUTO-MUTE2.0\_SVM, RF, MAESTRO, iPTREE-STAB, I-Mutant2.0\_SEQ, MUpro\_SVM and MUpro\_NN.

A: Predicting stable mutant when obtained the same number of votes.

B: Predicting instable mutant when obtained the same number of votes.
